# Supplementary material
Source: publisher figshare collection journal article supplement (https://acs.figshare.com/ndownloader/files/5858790)
Supplement: Supplementary file 1 [file 5858790]

data_aa
_audit_creation_date              2016-08-12
_audit_creation_method
;
Olex2 1.2
(compiled 2016.02.19 svn.r3266 for OlexSys, GUI svn.r5155)
;
_publ_contact_author_address      ?
_publ_contact_author_email        ?
_publ_contact_author_name         ''
_publ_contact_author_phone        ?
_publ_section_references
;
Bourhis, L.J., Dolomanov, O.V., Gildea, R.J., Howard, J.A.K., Puschmann, H.
 (2013). in preparation.

Dolomanov, O.V., Bourhis, L.J., Gildea, R.J, Howard, J.A.K. & Puschmann, H.
 (2009), J. Appl. Cryst. 42, 339-341.

Sheldrick, G.M. (2008). Acta Cryst. A64, 112-122.
;
_chemical_name_common             ?
_chemical_name_systematic
;
 ? 
;
_chemical_formula_moiety          'C21 H15 Cl O8'
_chemical_formula_sum             'C21 H15 Cl O8'
_chemical_formula_weight          430.78
_chemical_absolute_configuration  ad
_chemical_melting_point           ?
loop_
  _atom_type_symbol
  _atom_type_description
  _atom_type_scat_dispersion_real
  _atom_type_scat_dispersion_imag
  _atom_type_scat_source
 'C' 'C' 0.0181 0.0091 'International Tables Vol C Tables 4.2.6.8 and 6.1.1.4'
 'H' 'H' 0.0000 0.0000 'International Tables Vol C Tables 4.2.6.8 and 6.1.1.4'
 'O' 'O' 0.0492 0.0322 'International Tables Vol C Tables 4.2.6.8 and 6.1.1.4'
 'Cl' 'Cl' 0.3639 0.7018 'International Tables Vol C Tables 4.2.6.8 and 6.1.1.4'

_space_group_crystal_system       'orthorhombic'
_space_group_IT_number            19
_space_group_name_H-M_alt         'P 21 21 21'
_space_group_name_Hall            'P 2ac 2ab'
loop_
  _space_group_symop_id
  _space_group_symop_operation_xyz
 1 'x, y, z'
 2 '-x+1/2, -y, z+1/2'
 3 '-x, y+1/2, -z+1/2'
 4 'x+1/2, -y+1/2, -z'

_cell_length_a                    8.2824(2)
_cell_length_b                    11.9132(3)
_cell_length_c                    18.2409(5)
_cell_angle_alpha                 90.00
_cell_angle_beta                  90.00
_cell_angle_gamma                 90.00
_cell_volume                      1799.83(8)
_cell_formula_units_Z             4
_cell_measurement_reflns_used     2825
_cell_measurement_temperature     293(2)
_cell_measurement_theta_max       66.8750
_cell_measurement_theta_min       3.6900
_exptl_absorpt_coefficient_mu     2.349
_exptl_absorpt_correction_T_max   0.7345
_exptl_absorpt_correction_T_min   0.4459
_exptl_absorpt_correction_type    'multi-scan'
_exptl_absorpt_process_details    ?
_exptl_crystal_colour             yellow
_exptl_crystal_density_diffrn     1.590
_exptl_crystal_density_meas       ?
_exptl_crystal_density_method     'not measured'
_exptl_crystal_description        block
_exptl_crystal_F_000              888
_exptl_crystal_size_max           0.41
_exptl_crystal_size_mid           0.32
_exptl_crystal_size_min           0.14
_exptl_special_details
;
 ? 
;
_diffrn_reflns_av_R_equivalents   0.0300
_diffrn_reflns_av_unetI/netI      0.0388
_diffrn_reflns_limit_h_max        5
_diffrn_reflns_limit_h_min        -9
_diffrn_reflns_limit_k_max        14
_diffrn_reflns_limit_k_min        -13
_diffrn_reflns_limit_l_max        18
_diffrn_reflns_limit_l_min        -21
_diffrn_reflns_number             4965
_diffrn_reflns_theta_full         66.95
_diffrn_reflns_theta_max          66.95
_diffrn_reflns_theta_min          4.43
_diffrn_ambient_temperature       293(2)
_diffrn_detector_area_resol_mean  10.5058
_diffrn_measured_fraction_theta_full 0.990
_diffrn_measured_fraction_theta_max 0.990
_diffrn_measurement_device_type   'multiwire proportional'
_diffrn_measurement_method        'phi and omega scans'
_diffrn_measurement_details
;
#__ type_ start__ end____ width___ exp.time_
  1 omega  -20.00   71.00   1.0000    1.0000
omega____ theta____ kappa____ phi______ frames
    -       40.7938  -99.0000    0.0000 91

#__ type_ start__ end____ width___ exp.time_
  2 omega   17.00   47.00   1.0000    1.2450
omega____ theta____ kappa____ phi______ frames
    -       93.5000  -30.0000  -30.0000 30

#__ type_ start__ end____ width___ exp.time_
  3 omega   19.00   67.00   1.0000    1.2450
omega____ theta____ kappa____ phi______ frames
    -       93.5000  -30.0000  -90.0000 48

#__ type_ start__ end____ width___ exp.time_
  4 omega   43.00   69.00   1.0000    1.2450
omega____ theta____ kappa____ phi______ frames
    -       93.5000  -30.0000   30.0000 26

#__ type_ start__ end____ width___ exp.time_
  5 omega   63.00  128.00   1.0000    1.2450
omega____ theta____ kappa____ phi______ frames
    -       93.5000   30.0000   90.0000 65

#__ type_ start__ end____ width___ exp.time_
  6 omega  137.00  163.00   1.0000    1.2450
omega____ theta____ kappa____ phi______ frames
    -       93.5000   30.0000   90.0000 26

#__ type_ start__ end____ width___ exp.time_
  7 omega   33.00   93.00   1.0000    1.2450
omega____ theta____ kappa____ phi______ frames
    -       93.5000 -126.0000 -120.0000 60

#__ type_ start__ end____ width___ exp.time_
  8 omega   30.00   84.00   1.0000    1.2450
omega____ theta____ kappa____ phi______ frames
    -       93.5000 -126.0000 -180.0000 54

#__ type_ start__ end____ width___ exp.time_
  9 omega  -92.00  -48.00   1.0000    1.0000
omega____ theta____ kappa____ phi______ frames
    -      -40.7938  126.0000  -30.0000 44

;
_diffrn_radiation_monochromator   'graphite'
_diffrn_radiation_type            CuK\a
_diffrn_radiation_wavelength      1.54178
_diffrn_source                    'fine-focus sealed tube'
_diffrn_standards_decay_%         ?
_diffrn_standards_interval_count  ?
_diffrn_standards_interval_time   ?
_diffrn_standards_number          ?
_reflns_number_gt                 2667
_reflns_number_total              2872
_reflns_threshold_expression      >2sigma(I)
_computing_cell_refinement        ?
_computing_data_collection        ?
_computing_data_reduction         ?
_computing_molecular_graphics     'Olex2 (Dolomanov et al., 2009)'
_computing_publication_material   'Olex2 (Dolomanov et al., 2009)'
_computing_structure_refinement   'XL (Sheldrick, 2008)'
_computing_structure_solution     'SHELXS-97 (Sheldrick, 1990)'
_refine_diff_density_max          0.205
_refine_diff_density_min          -0.279
_refine_diff_density_rms          0.051
_refine_ls_abs_structure_details  'Flack H D (1983), Acta Cryst. A39, 876-881'
_refine_ls_abs_structure_Flack    0.012(17)
_refine_ls_extinction_coef        0.0014(2)
_refine_ls_extinction_expression  'Fc^*^=kFc[1+0.001xFc^2^\l^3^/sin(2\q)]^-1/4^'
_refine_ls_extinction_method      SHELXL
_refine_ls_goodness_of_fit_ref    1.056
_refine_ls_hydrogen_treatment     constr
_refine_ls_matrix_type            full
_refine_ls_number_parameters      275
_refine_ls_number_reflns          2872
_refine_ls_number_restraints      0
_refine_ls_R_factor_all           0.0393
_refine_ls_R_factor_gt            0.0350
_refine_ls_restrained_S_all       1.056
_refine_ls_shift/su_max           0.001
_refine_ls_shift/su_mean          0.000
_refine_ls_structure_factor_coef  Fsqd
_refine_ls_weighting_details
'calc w=1/[\s^2^(Fo^2^)+(0.0520P)^2^+0.0000P] where P=(Fo^2^+2Fc^2^)/3'
_refine_ls_weighting_scheme       calc
_refine_ls_wR_factor_gt           0.0850
_refine_ls_wR_factor_ref          0.0896
_refine_special_details
;
 Refinement of F^2^ against ALL reflections.  The weighted R-factor wR and 
 goodness of fit S are based on F^2^, conventional R-factors R are based 
 on F, with F set to zero for negative F^2^. The threshold expression of 
 F^2^ > 2sigma(F^2^) is used only for calculating R-factors(gt) etc. and is 
 not relevant to the choice of reflections for refinement.  R-factors based 
 on F^2^ are statistically about twice as large as those based on F, and R- 
 factors based on ALL data will be even larger. 
;
_olex2_refinement_description
;
1. Fixed Uiso
 At 1.2 times of:
  All C(H) groups, All C(H,H) groups
 At 1.5 times of:
  All C(H,H,H) groups, All O(H) groups
2.a Ternary CH refined with riding coordinates:
 C3(H3), C2(H2A), C3'(H3')
2.b Secondary CH2 refined with riding coordinates:
 C2'(H2'A,H2'B)
2.c Aromatic/amide H refined with riding coordinates:
 C7(H7), C9'(H9'), C7'(H7'), C8'(H8'), C8(H8)
2.d Idealised Me refined as rotating group:
 C11'(H11A,H11B,H11C)
2.e Idealised tetrahedral OH refined as rotating group:
 O6(H6), O2(H2)
;
_atom_sites_solution_hydrogens    geom
_atom_sites_solution_primary      direct
_atom_sites_solution_secondary    difmap
loop_
  _atom_site_label
  _atom_site_type_symbol
  _atom_site_fract_x
  _atom_site_fract_y
  _atom_site_fract_z
  _atom_site_U_iso_or_equiv
  _atom_site_adp_type
  _atom_site_occupancy
  _atom_site_calc_flag
  _atom_site_disorder_assembly
  _atom_site_disorder_group
  _atom_site_refinement_flags_posn
 Cl1 Cl 0.84206(8) 0.41110(6) 0.73569(3) 0.02763(18) Uani 1 d . . .
 O6 O 0.6961(2) 0.39923(16) 0.57852(9) 0.0213(4) Uani 1 d . . .
 H6 H 0.6508 0.3474 0.5998 0.032 Uiso 1 calc . . GR
 O5 O 1.11595(19) 0.41764(15) 0.53318(8) 0.0174(4) Uani 1 d . . .
 O3 O 0.9025(2) 0.51926(14) 0.37587(8) 0.0180(4) Uani 1 d . . .
 O4 O 0.8966(2) 0.36836(14) 0.45841(8) 0.0153(4) Uani 1 d . . .
 C10' C 1.2503(3) 0.4074(2) 0.34095(13) 0.0168(5) Uani 1 d . . .
 O7 O 0.9626(2) 0.22495(15) 0.34661(9) 0.0205(4) Uani 1 d . . .
 O1 O 0.8463(2) 0.64816(15) 0.69281(9) 0.0242(4) Uani 1 d . . .
 C6' C 1.2128(3) 0.4175(2) 0.47155(12) 0.0162(5) Uani 1 d . . .
 C4' C 0.9672(3) 0.4107(2) 0.39316(13) 0.0153(5) Uani 1 d . . .
 C3 C 0.8655(3) 0.3901(2) 0.58851(12) 0.0171(5) Uani 1 d . . .
 H3 H 0.8957 0.3117 0.5974 0.021 Uiso 1 calc . . R
 C4 C 0.9462(3) 0.4333(2) 0.51899(13) 0.0147(5) Uani 1 d . . .
 C7 C 0.8385(4) 0.7013(2) 0.42028(14) 0.0264(6) Uani 1 d . . .
 H7 H 0.8230 0.7247 0.3721 0.032 Uiso 1 calc . . R
 O8 O 1.2641(2) 0.39490(16) 0.21146(9) 0.0233(4) Uani 1 d . . .
 C6 C 0.8864(3) 0.5912(2) 0.43452(13) 0.0176(5) Uani 1 d . . .
 O2 O 0.8005(3) 0.81544(16) 0.60313(11) 0.0384(5) Uani 1 d . . .
 H2 H 0.8239 0.7883 0.6431 0.058 Uiso 1 calc . . GR
 C1 C 0.8782(3) 0.5868(2) 0.64090(13) 0.0187(5) Uani 1 d . . .
 C2' C 0.9992(3) 0.3773(2) 0.25964(14) 0.0198(6) Uani 1 d . . .
 H2'A H 0.9777 0.3237 0.2208 0.024 Uiso 1 calc . . R
 H2'B H 0.9516 0.4483 0.2452 0.024 Uiso 1 calc . . R
 C9' C 1.4159(3) 0.4091(2) 0.35073(13) 0.0189(5) Uani 1 d . . .
 H9' H 1.4844 0.4059 0.3104 0.023 Uiso 1 calc . . R
 C5' C 1.1473(3) 0.4138(2) 0.40188(12) 0.0152(5) Uani 1 d . . .
 C2 C 0.9210(3) 0.4634(2) 0.65153(13) 0.0192(5) Uani 1 d . . .
 H2A H 1.0389 0.4580 0.6541 0.023 Uiso 1 calc . . R
 C7' C 1.3788(3) 0.4188(2) 0.48180(14) 0.0206(6) Uani 1 d . . .
 H7' H 1.4219 0.4216 0.5289 0.025 Uiso 1 calc . . R
 C5 C 0.9071(3) 0.5548(2) 0.50573(13) 0.0161(5) Uani 1 d . . .
 C10 C 0.8778(3) 0.6285(2) 0.56476(14) 0.0194(5) Uani 1 d . . .
 C8' C 1.4798(3) 0.4157(2) 0.42135(14) 0.0219(6) Uani 1 d . . .
 H8' H 1.5911 0.4180 0.4279 0.026 Uiso 1 calc . . R
 C9 C 0.8326(4) 0.7401(2) 0.54961(15) 0.0266(6) Uani 1 d . . .
 C3' C 0.9165(3) 0.3371(2) 0.32912(12) 0.0155(5) Uani 1 d . . .
 H3' H 0.7991 0.3410 0.3229 0.019 Uiso 1 calc . . R
 C1' C 1.1803(3) 0.3926(2) 0.26624(13) 0.0170(5) Uani 1 d . . .
 C8 C 0.8143(4) 0.7752(2) 0.47665(15) 0.0305(7) Uani 1 d . . .
 H8 H 0.7856 0.8491 0.4666 0.037 Uiso 1 calc . . R
 C11' C 0.8694(4) 0.1435(2) 0.30988(15) 0.0327(7) Uani 1 d . . .
 H11A H 0.8871 0.0714 0.3319 0.049 Uiso 1 calc . . GR
 H11B H 0.9005 0.1409 0.2592 0.049 Uiso 1 calc . . GR
 H11C H 0.7571 0.1627 0.3135 0.049 Uiso 1 calc . . GR

loop_
  _atom_site_aniso_label
  _atom_site_aniso_U_11
  _atom_site_aniso_U_22
  _atom_site_aniso_U_33
  _atom_site_aniso_U_23
  _atom_site_aniso_U_13
  _atom_site_aniso_U_12
 Cl1 0.0372(4) 0.0310(3) 0.0148(3) 0.0014(3) 0.0034(3) -0.0029(3)
 O6 0.0161(8) 0.0261(10) 0.0218(9) 0.0047(8) 0.0004(7) -0.0044(8)
 O5 0.0145(8) 0.0249(9) 0.0128(8) -0.0017(7) -0.0005(7) 0.0024(8)
 O3 0.0219(8) 0.0179(9) 0.0143(8) 0.0013(7) -0.0030(7) 0.0052(8)
 O4 0.0172(8) 0.0176(8) 0.0112(8) -0.0008(6) 0.0000(7) -0.0010(7)
 C10' 0.0189(12) 0.0145(12) 0.0169(12) 0.0009(10) -0.0013(10) -0.0009(11)
 O7 0.0251(9) 0.0177(9) 0.0186(8) -0.0038(7) -0.0039(8) 0.0006(8)
 O1 0.0290(10) 0.0258(10) 0.0178(9) -0.0058(7) 0.0050(8) 0.0010(9)
 C6' 0.0186(11) 0.0160(12) 0.0141(11) -0.0014(10) 0.0030(10) 0.0010(11)
 C4' 0.0173(11) 0.0137(11) 0.0148(11) 0.0034(10) 0.0024(10) 0.0007(11)
 C3 0.0186(12) 0.0180(12) 0.0147(11) 0.0004(10) 0.0004(10) -0.0021(10)
 C4 0.0116(11) 0.0170(13) 0.0156(11) -0.0009(10) -0.0017(10) 0.0001(10)
 C7 0.0347(16) 0.0213(13) 0.0233(14) 0.0045(11) 0.0009(13) 0.0035(13)
 O8 0.0238(9) 0.0298(10) 0.0164(8) 0.0009(8) 0.0037(7) 0.0003(9)
 C6 0.0187(12) 0.0188(12) 0.0153(11) -0.0006(10) 0.0012(10) -0.0002(11)
 O2 0.0664(15) 0.0196(10) 0.0293(11) -0.0081(8) 0.0042(11) 0.0077(11)
 C1 0.0142(12) 0.0222(13) 0.0197(12) -0.0023(11) 0.0006(10) -0.0013(11)
 C2' 0.0209(12) 0.0249(14) 0.0136(11) -0.0016(10) -0.0002(10) 0.0017(11)
 C9' 0.0189(11) 0.0175(12) 0.0202(12) 0.0014(11) 0.0046(10) 0.0004(12)
 C5' 0.0163(11) 0.0135(11) 0.0158(11) 0.0008(10) -0.0003(10) 0.0002(11)
 C2 0.0188(12) 0.0243(14) 0.0144(11) 0.0026(10) 0.0014(11) -0.0006(11)
 C7' 0.0205(12) 0.0230(13) 0.0183(12) -0.0034(11) -0.0051(10) 0.0020(12)
 C5 0.0149(11) 0.0168(12) 0.0165(12) 0.0012(10) 0.0000(10) 0.0005(11)
 C10 0.0193(12) 0.0199(13) 0.0191(12) -0.0006(10) 0.0023(11) -0.0018(11)
 C8' 0.0154(11) 0.0256(14) 0.0248(13) -0.0027(11) -0.0018(11) -0.0024(12)
 C9 0.0356(16) 0.0195(13) 0.0246(14) -0.0055(11) 0.0017(13) 0.0018(13)
 C3' 0.0121(11) 0.0189(12) 0.0155(12) 0.0007(10) -0.0033(10) 0.0020(10)
 C1' 0.0211(12) 0.0138(11) 0.0159(11) 0.0020(10) 0.0006(11) 0.0011(11)
 C8 0.0436(17) 0.0161(12) 0.0318(15) 0.0053(12) 0.0018(14) 0.0059(14)
 C11' 0.0401(17) 0.0242(14) 0.0338(15) -0.0073(12) -0.0060(14) -0.0084(14)

_geom_special_details
;
 All esds (except the esd in the dihedral angle between two l.s. planes) 
 are estimated using the full covariance matrix.  The cell esds are taken 
 into account individually in the estimation of esds in distances, angles 
 and torsion angles; correlations between esds in cell parameters are only 
 used when they are defined by crystal symmetry.  An approximate (isotropic) 
 treatment of cell esds is used for estimating esds involving l.s. planes. 
;
loop_
  _geom_bond_atom_site_label_1
  _geom_bond_atom_site_label_2
  _geom_bond_distance
  _geom_bond_site_symmetry_2
  _geom_bond_publ_flag
 Cl1 C2 1.781(2) . ?
 O6 H6 0.8200 . ?
 O6 C3 1.419(3) . ?
 O5 C6' 1.381(3) . ?
 O5 C4 1.442(3) . ?
 O3 C4' 1.435(3) . ?
 O3 C6 1.377(3) . ?
 O4 C4' 1.419(3) . ?
 O4 C4 1.410(3) . ?
 C10' C9' 1.384(3) . ?
 C10' C5' 1.403(3) . ?
 C10' C1' 1.491(3) . ?
 O7 C3' 1.426(3) . ?
 O7 C11' 1.409(3) . ?
 O1 C1 1.225(3) . ?
 C6' C5' 1.383(3) . ?
 C6' C7' 1.388(3) . ?
 C4' C5' 1.500(3) . ?
 C4' C3' 1.520(3) . ?
 C3 H3 0.9800 . ?
 C3 C4 1.523(3) . ?
 C3 C2 1.515(3) . ?
 C4 C5 1.503(3) . ?
 C7 H7 0.9300 . ?
 C7 C6 1.395(4) . ?
 C7 C8 1.369(4) . ?
 O8 C1' 1.217(3) . ?
 C6 C5 1.380(3) . ?
 O2 H2 0.8200 . ?
 O2 C9 1.353(3) . ?
 C1 C2 1.524(3) . ?
 C1 C10 1.475(3) . ?
 C2' H2'A 0.9700 . ?
 C2' H2'B 0.9700 . ?
 C2' C3' 1.518(3) . ?
 C2' C1' 1.516(3) . ?
 C9' H9' 0.9300 . ?
 C9' C8' 1.395(3) . ?
 C2 H2A 0.9800 . ?
 C7' H7' 0.9300 . ?
 C7' C8' 1.384(4) . ?
 C5 C10 1.410(3) . ?
 C10 C9 1.409(4) . ?
 C8' H8' 0.9300 . ?
 C9 C8 1.403(4) . ?
 C3' H3' 0.9800 . ?
 C8 H8 0.9300 . ?
 C11' H11A 0.9600 . ?
 C11' H11B 0.9600 . ?
 C11' H11C 0.9600 . ?

loop_
  _geom_angle_atom_site_label_1
  _geom_angle_atom_site_label_2
  _geom_angle_atom_site_label_3
  _geom_angle
  _geom_angle_site_symmetry_1
  _geom_angle_site_symmetry_3
  _geom_angle_publ_flag
 C3 O6 H6 109.5 . . ?
 C6' O5 C4 114.86(17) . . ?
 C6 O3 C4' 115.22(17) . . ?
 C4 O4 C4' 109.99(17) . . ?
 C9' C10' C5' 120.0(2) . . ?
 C9' C10' C1' 120.3(2) . . ?
 C5' C10' C1' 119.6(2) . . ?
 C11' O7 C3' 113.09(19) . . ?
 O5 C6' C5' 121.3(2) . . ?
 O5 C6' C7' 117.8(2) . . ?
 C5' C6' C7' 120.9(2) . . ?
 O3 C4' C5' 111.9(2) . . ?
 O3 C4' C3' 104.34(18) . . ?
 O4 C4' O3 110.55(19) . . ?
 O4 C4' C5' 109.24(19) . . ?
 O4 C4' C3' 108.98(19) . . ?
 C5' C4' C3' 111.7(2) . . ?
 O6 C3 H3 110.3 . . ?
 O6 C3 C4 107.54(18) . . ?
 O6 C3 C2 110.7(2) . . ?
 C4 C3 H3 110.3 . . ?
 C2 C3 H3 110.3 . . ?
 C2 C3 C4 107.7(2) . . ?
 O5 C4 C3 103.59(18) . . ?
 O5 C4 C5 111.31(19) . . ?
 O4 C4 O5 110.73(18) . . ?
 O4 C4 C3 109.83(19) . . ?
 O4 C4 C5 109.85(19) . . ?
 C5 C4 C3 111.4(2) . . ?
 C6 C7 H7 119.8 . . ?
 C8 C7 H7 119.8 . . ?
 C8 C7 C6 120.5(2) . . ?
 O3 C6 C7 117.9(2) . . ?
 O3 C6 C5 121.6(2) . . ?
 C5 C6 C7 120.4(2) . . ?
 C9 O2 H2 109.5 . . ?
 O1 C1 C2 121.8(2) . . ?
 O1 C1 C10 121.7(2) . . ?
 C10 C1 C2 116.4(2) . . ?
 H2'A C2' H2'B 107.6 . . ?
 C3' C2' H2'A 108.6 . . ?
 C3' C2' H2'B 108.6 . . ?
 C1' C2' H2'A 108.6 . . ?
 C1' C2' H2'B 108.6 . . ?
 C1' C2' C3' 114.7(2) . . ?
 C10' C9' H9' 120.1 . . ?
 C10' C9' C8' 119.7(2) . . ?
 C8' C9' H9' 120.1 . . ?
 C10' C5' C4' 121.3(2) . . ?
 C6' C5' C10' 119.4(2) . . ?
 C6' C5' C4' 119.2(2) . . ?
 Cl1 C2 H2A 107.5 . . ?
 C3 C2 Cl1 109.91(17) . . ?
 C3 C2 C1 112.9(2) . . ?
 C3 C2 H2A 107.5 . . ?
 C1 C2 Cl1 111.20(17) . . ?
 C1 C2 H2A 107.5 . . ?
 C6' C7' H7' 120.3 . . ?
 C8' C7' C6' 119.4(2) . . ?
 C8' C7' H7' 120.3 . . ?
 C6 C5 C4 118.7(2) . . ?
 C6 C5 C10 120.1(2) . . ?
 C10 C5 C4 120.9(2) . . ?
 C5 C10 C1 120.6(2) . . ?
 C9 C10 C1 120.2(2) . . ?
 C9 C10 C5 118.9(2) . . ?
 C9' C8' H8' 119.7 . . ?
 C7' C8' C9' 120.6(2) . . ?
 C7' C8' H8' 119.7 . . ?
 O2 C9 C10 122.5(2) . . ?
 O2 C9 C8 117.7(2) . . ?
 C8 C9 C10 119.8(2) . . ?
 O7 C3' C4' 107.14(18) . . ?
 O7 C3' C2' 111.2(2) . . ?
 O7 C3' H3' 109.6 . . ?
 C4' C3' H3' 109.6 . . ?
 C2' C3' C4' 109.6(2) . . ?
 C2' C3' H3' 109.6 . . ?
 C10' C1' C2' 118.1(2) . . ?
 O8 C1' C10' 121.7(2) . . ?
 O8 C1' C2' 120.1(2) . . ?
 C7 C8 C9 120.3(3) . . ?
 C7 C8 H8 119.8 . . ?
 C9 C8 H8 119.8 . . ?
 O7 C11' H11A 109.5 . . ?
 O7 C11' H11B 109.5 . . ?
 O7 C11' H11C 109.5 . . ?
 H11A C11' H11B 109.5 . . ?
 H11A C11' H11C 109.5 . . ?
 H11B C11' H11C 109.5 . . ?

loop_
  _geom_torsion_atom_site_label_1
  _geom_torsion_atom_site_label_2
  _geom_torsion_atom_site_label_3
  _geom_torsion_atom_site_label_4
  _geom_torsion
  _geom_torsion_site_symmetry_1
  _geom_torsion_site_symmetry_2
  _geom_torsion_site_symmetry_3
  _geom_torsion_site_symmetry_4
  _geom_torsion_publ_flag
 O6 C3 C4 O5 -178.28(18) . . . . ?
 O6 C3 C4 O4 -60.0(2) . . . . ?
 O6 C3 C4 C5 62.0(2) . . . . ?
 O6 C3 C2 Cl1 66.8(2) . . . . ?
 O6 C3 C2 C1 -57.9(3) . . . . ?
 O5 C6' C5' C10' -176.4(2) . . . . ?
 O5 C6' C5' C4' 0.6(4) . . . . ?
 O5 C6' C7' C8' 178.3(2) . . . . ?
 O5 C4 C5 C6 101.0(3) . . . . ?
 O5 C4 C5 C10 -84.6(3) . . . . ?
 O3 C4' C5' C10' -83.3(3) . . . . ?
 O3 C4' C5' C6' 99.8(3) . . . . ?
 O3 C4' C3' O7 -174.01(18) . . . . ?
 O3 C4' C3' C2' 65.2(2) . . . . ?
 O3 C6 C5 C4 -0.7(4) . . . . ?
 O3 C6 C5 C10 -175.2(2) . . . . ?
 O4 C4' C5' C10' 153.9(2) . . . . ?
 O4 C4' C5' C6' -23.0(3) . . . . ?
 O4 C4' C3' O7 -55.9(2) . . . . ?
 O4 C4' C3' C2' -176.64(19) . . . . ?
 O4 C4 C5 C6 -22.0(3) . . . . ?
 O4 C4 C5 C10 152.4(2) . . . . ?
 C10' C9' C8' C7' 1.0(4) . . . . ?
 O1 C1 C2 Cl1 23.4(3) . . . . ?
 O1 C1 C2 C3 147.5(2) . . . . ?
 O1 C1 C10 C5 -176.8(2) . . . . ?
 O1 C1 C10 C9 -3.1(4) . . . . ?
 C6' O5 C4 O4 43.3(3) . . . . ?
 C6' O5 C4 C3 160.95(19) . . . . ?
 C6' O5 C4 C5 -79.2(2) . . . . ?
 C6' C7' C8' C9' -1.3(4) . . . . ?
 C4' O3 C6 C7 174.1(2) . . . . ?
 C4' O3 C6 C5 -9.8(3) . . . . ?
 C4' O4 C4 O5 -68.2(2) . . . . ?
 C4' O4 C4 C3 178.01(19) . . . . ?
 C4' O4 C4 C5 55.2(2) . . . . ?
 C3 C4 C5 C6 -143.9(2) . . . . ?
 C3 C4 C5 C10 30.5(3) . . . . ?
 C4 O5 C6' C5' -10.3(3) . . . . ?
 C4 O5 C6' C7' 171.1(2) . . . . ?
 C4 O4 C4' O3 -67.8(2) . . . . ?
 C4 O4 C4' C5' 55.8(2) . . . . ?
 C4 O4 C4' C3' 178.12(18) . . . . ?
 C4 C3 C2 Cl1 -175.87(16) . . . . ?
 C4 C3 C2 C1 59.4(3) . . . . ?
 C4 C5 C10 C1 -2.6(4) . . . . ?
 C4 C5 C10 C9 -176.4(2) . . . . ?
 C7 C6 C5 C4 175.3(2) . . . . ?
 C7 C6 C5 C10 0.8(4) . . . . ?
 C6 O3 C4' O4 43.0(3) . . . . ?
 C6 O3 C4' C5' -79.0(3) . . . . ?
 C6 O3 C4' C3' 160.03(19) . . . . ?
 C6 C7 C8 C9 -1.9(5) . . . . ?
 C6 C5 C10 C1 171.8(2) . . . . ?
 C6 C5 C10 C9 -2.0(4) . . . . ?
 O2 C9 C8 C7 -177.3(3) . . . . ?
 C1 C10 C9 O2 5.3(4) . . . . ?
 C1 C10 C9 C8 -172.5(3) . . . . ?
 C9' C10' C5' C6' -2.4(4) . . . . ?
 C9' C10' C5' C4' -179.3(3) . . . . ?
 C9' C10' C1' O8 -8.7(4) . . . . ?
 C9' C10' C1' C2' 172.8(3) . . . . ?
 C5' C10' C9' C8' 0.8(4) . . . . ?
 C5' C10' C1' O8 174.6(2) . . . . ?
 C5' C10' C1' C2' -4.0(4) . . . . ?
 C5' C6' C7' C8' -0.3(4) . . . . ?
 C5' C4' C3' O7 64.9(2) . . . . ?
 C5' C4' C3' C2' -55.8(3) . . . . ?
 C2 C3 C4 O5 62.4(2) . . . . ?
 C2 C3 C4 O4 -179.29(19) . . . . ?
 C2 C3 C4 C5 -57.4(3) . . . . ?
 C2 C1 C10 C5 3.4(3) . . . . ?
 C2 C1 C10 C9 177.2(2) . . . . ?
 C7' C6' C5' C10' 2.1(4) . . . . ?
 C7' C6' C5' C4' 179.1(2) . . . . ?
 C5 C10 C9 O2 179.1(3) . . . . ?
 C5 C10 C9 C8 1.3(4) . . . . ?
 C10 C1 C2 Cl1 -156.86(18) . . . . ?
 C10 C1 C2 C3 -32.8(3) . . . . ?
 C10 C9 C8 C7 0.7(5) . . . . ?
 C3' C4' C5' C10' 33.3(3) . . . . ?
 C3' C4' C5' C6' -143.7(2) . . . . ?
 C3' C2' C1' C10' -21.1(3) . . . . ?
 C3' C2' C1' O8 160.3(2) . . . . ?
 C1' C10' C9' C8' -175.9(2) . . . . ?
 C1' C10' C5' C6' 174.4(2) . . . . ?
 C1' C10' C5' C4' -2.6(4) . . . . ?
 C1' C2' C3' O7 -67.7(3) . . . . ?
 C1' C2' C3' C4' 50.5(3) . . . . ?
 C8 C7 C6 O3 177.4(3) . . . . ?
 C8 C7 C6 C5 1.2(4) . . . . ?
 C11' O7 C3' C4' 155.3(2) . . . . ?
 C11' O7 C3' C2' -85.0(3) . . . . ?

_olex2_submission_special_instructions 'No special instructions were received'
